# Supplementary material
Source: publisher figshare collection journal article supplement (https://acs.figshare.com/ndownloader/files/5720826)
Supplement: Supplementary file 1 [file 5720826]

# ja003705+.cif

#==============================================================================
data_global
#==============================================================================

# SUBMISSION DETAILS

_publ_contact_author_name            'Arthur Mar'
_publ_contact_author_address
; Department of Chemistry
  University of Alberta
  Edmonton, AB
  Canada  T6G 2G2
;
_publ_contact_author_email           arthur.mar@ualberta.ca
_publ_contact_author_fax             '(780) 492-8231'
_publ_contact_author_phone           '(780) 492-5592'

_publ_contact_letter
; ?
;
   
_publ_requested_journal              'J. Am. Chem. Soc.'

#==============================================================================

# TITLE AND AUTHOR LIST

_publ_section_title                  'Rare-Earth Gallium Antimonides'
_publ_section_title_footnote
; ?
;         

loop_
        _publ_author_name
        _publ_author_footnote
        _publ_author_address
'Mills, Allison M.'
; ?
;
; Department of Chemistry
  University of Alberta
  Edmonton, AB
  Canada  T6G 2G2
;
'Mar, Arthur'
; ?
;
; Department of Chemistry
  University of Alberta
  Edmonton, AB
  Canada  T6G 2G2
;
#==============================================================================

# TEXT

_publ_section_synopsis
; ?
;
_publ_section_abstract
; Crystal structures of samarium gallium antimonide and neodymium gallium
  antimonide.
;
_publ_section_comment
; ?
;

#==============================================================================

data_c222 
 
_audit_creation_method            SHELXL-97 
_chemical_name_systematic         'samarium gallium antimonide' 
_chemical_name_common             'samarium gallium antimonide' 
_chemical_melting_point           ? 
_chemical_formula_moiety          'Ga Sb2 Sm' 
_chemical_formula_sum             'Ga Sb2 Sm' 
_chemical_formula_weight          463.57 
 
loop_ 
 _atom_type_symbol 
 _atom_type_description 
 _atom_type_scat_dispersion_real 
 _atom_type_scat_dispersion_imag 
 _atom_type_scat_source 
 'Ga'  'Ga'   0.2307   1.6083 
 'International Tables Vol C Tables 4.2.6.8 and 6.1.1.4' 
 'Sb'  'Sb'  -0.5866   1.5461 
 'International Tables Vol C Tables 4.2.6.8 and 6.1.1.4' 
 'Sm'  'Sm'  -0.1638   3.4418 
 'International Tables Vol C Tables 4.2.6.8 and 6.1.1.4' 
 
_symmetry_cell_setting            orthorhombic 
_symmetry_space_group_name_H-M    'C 2 2 21' 
 
loop_ 
 _symmetry_equiv_pos_as_xyz 
 'x, y, z' 
 '-x, -y, z+1/2' 
 '-x, y, -z+1/2' 
 'x, -y, -z' 
 'x+1/2, y+1/2, z' 
 '-x+1/2, -y+1/2, z+1/2' 
 '-x+1/2, y+1/2, -z+1/2' 
 'x+1/2, -y+1/2, -z' 
 
_cell_length_a                    4.3087(5) 
_cell_length_b                    22.093(4) 
_cell_length_c                    4.3319(4) 
_cell_angle_alpha                 90.00 
_cell_angle_beta                  90.00 
_cell_angle_gamma                 90.00 
_cell_volume                      412.36(10) 
_cell_formula_units_Z             4 
_cell_measurement_temperature     295(2) 
_cell_measurement_reflns_used     24 
_cell_measurement_theta_min       13 
_cell_measurement_theta_max       25 
 
_exptl_crystal_description        plate 
_exptl_crystal_colour             black 
_exptl_crystal_size_max           0.16 
_exptl_crystal_size_mid           0.12 
_exptl_crystal_size_min           0.01 
_exptl_crystal_density_meas       'not measured' 
_exptl_crystal_density_diffrn     7.467 
_exptl_crystal_density_method     'not measured' 
_exptl_crystal_F_000              780 
_exptl_absorpt_coefficient_mu     33.213 
_exptl_absorpt_correction_type    numerical 
_exptl_absorpt_correction_T_min   0.0761 
_exptl_absorpt_correction_T_max   0.6535 
_exptl_absorpt_process_details    'Bruker SHELXTL 5.1'  
 
_exptl_special_details 
; 
 ? 
; 
 
_diffrn_ambient_temperature       295(2) 
_diffrn_radiation_wavelength      0.71073 
_diffrn_radiation_type            MoK\a 
_diffrn_radiation_source          'fine-focus sealed tube' 
_diffrn_radiation_monochromator   graphite 
_diffrn_measurement_device_type   'Enraf-Nonius CAD4' 
_diffrn_measurement_method        \q--2\q 
_diffrn_detector_area_resol_mean  ? 
_diffrn_standards_number          3 
_diffrn_standards_interval_count  ? 
_diffrn_standards_interval_time   7200 
_diffrn_standards_decay_%         ? 
_diffrn_reflns_number             3582 
_diffrn_reflns_av_R_equivalents   0.0763 
_diffrn_reflns_av_sigmaI/netI     0.0451 
_diffrn_reflns_limit_h_min        -6 
_diffrn_reflns_limit_h_max        6 
_diffrn_reflns_limit_k_min        -35 
_diffrn_reflns_limit_k_max        35 
_diffrn_reflns_limit_l_min        -6 
_diffrn_reflns_limit_l_max        6 
_diffrn_reflns_theta_min          1.84 
_diffrn_reflns_theta_max          34.93 
_reflns_number_total              907 
_reflns_number_gt                 848 
_reflns_threshold_expression      >2sigma(I) 
 
_computing_data_collection        'CAD4/PC (Enraf-Nonius)' 
_computing_cell_refinement        'CAD4/PC (Enraf-Nonius)' 
_computing_data_reduction         'XCAD4' 
_computing_structure_solution     'Bruker SHELXTL 5.1' 
_computing_structure_refinement   'Bruker SHELXTL 5.1' 
_computing_molecular_graphics     'ATOMS 4.0' 
_computing_publication_material   'Bruker SHELXTL 5.1'  
 
_refine_special_details 
; 
 Refinement of F^2^ against ALL reflections.  The weighted R-factor wR and 
 goodness of fit S are based on F^2^, conventional R-factors R are based 
 on F, with F set to zero for negative F^2^. The threshold expression of 
 F^2^ > 2sigma(F^2^) is used only for calculating R-factors(gt) etc. and is 
 not relevant to the choice of reflections for refinement.  R-factors based 
 on F^2^ are statistically about twice as large as those based on F, and R- 
 factors based on ALL data will be even larger. 
; 
 
_refine_ls_structure_factor_coef  Fsqd  
_refine_ls_matrix_type            full 
_refine_ls_weighting_scheme       calc  
_refine_ls_weighting_details 
 'calc w=1/[\s^2^(Fo^2^)+(0.0308P)^2^+7.8140P] where P=(Fo^2^+2Fc^2^)/3' 
_atom_sites_solution_primary      direct 
_atom_sites_solution_secondary    difmap 
_atom_sites_solution_hydrogens    geom 
_refine_ls_hydrogen_treatment     mixed 
_refine_ls_extinction_method      SHELXL 
_refine_ls_extinction_coef        0.0060(4) 
_refine_ls_extinction_expression 
 'Fc^*^=kFc[1+0.001xFc^2^\l^3^/sin(2\q)]^-1/4^' 
_refine_ls_abs_structure_details 
 'Flack H D (1983), Acta Cryst. A39, 876-881' 
_refine_ls_abs_structure_Flack    0.54(6) 
_refine_ls_number_reflns          907 
_refine_ls_number_parameters      23 
_refine_ls_number_restraints      0 
_refine_ls_R_factor_all           0.0318 
_refine_ls_R_factor_gt            0.0293 
_refine_ls_wR_factor_ref          0.0737 
_refine_ls_wR_factor_gt           0.0722 
_refine_ls_goodness_of_fit_ref    1.055 
_refine_ls_restrained_S_all       1.055 
_refine_ls_shift/su_max           0.001 
_refine_ls_shift/su_mean          0.000 
 
loop_ 
 _atom_site_label 
 _atom_site_type_symbol 
 _atom_site_fract_x 
 _atom_site_fract_y 
 _atom_site_fract_z 
 _atom_site_U_iso_or_equiv 
 _atom_site_adp_type 
 _atom_site_occupancy 
 _atom_site_symmetry_multiplicity 
 _atom_site_calc_flag 
 _atom_site_refinement_flags 
 _atom_site_disorder_assembly 
 _atom_site_disorder_group 
Sm1 Sm 0.0000 0.138632(18) 0.2500 0.00760(12) Uani 1 2 d S . . 
Ga1 Ga 0.1538(4) 0.0000 0.0000 0.0232(3) Uani 1 2 d S . . 
Sb1 Sb 0.0000 0.40698(3) 0.2500 0.00881(13) Uani 1 2 d S . . 
Sb2 Sb 0.0000 0.75016(2) 0.2500 0.00795(13) Uani 1 2 d S . . 
 
loop_ 
 _atom_site_aniso_label 
 _atom_site_aniso_U_11 
 _atom_site_aniso_U_22 
 _atom_site_aniso_U_33 
 _atom_site_aniso_U_23 
 _atom_site_aniso_U_13 
 _atom_site_aniso_U_12 
Sm1 0.00753(18) 0.00632(17) 0.00895(17) 0.000 -0.0006(4) 0.000 
Ga1 0.0311(8) 0.0087(5) 0.0297(7) 0.0054(6) 0.000 0.000 
Sb1 0.0076(2) 0.0095(2) 0.0094(2) 0.000 -0.0005(6) 0.000 
Sb2 0.0075(2) 0.0071(2) 0.0092(2) 0.000 -0.0002(5) 0.000 
 
_geom_special_details 
; 
 All esds (except the esd in the dihedral angle between two l.s. planes) 
 are estimated using the full covariance matrix.  The cell esds are taken 
 into account individually in the estimation of esds in distances, angles 
 and torsion angles; correlations between esds in cell parameters are only 
 used when they are defined by crystal symmetry.  An approximate (isotropic) 
 treatment of cell esds is used for estimating esds involving l.s. planes. 
; 
 
loop_ 
 _geom_bond_atom_site_label_1 
 _geom_bond_atom_site_label_2 
 _geom_bond_distance 
 _geom_bond_site_symmetry_2 
 _geom_bond_publ_flag 
Sm1 Sb1 3.2169(3) 6_454 ? 
Sm1 Sb1 3.2169(3) 6 ? 
Sm1 Sb1 3.2169(3) 6_455 ? 
Sm1 Sb1 3.2169(3) 6_554 ? 
Sm1 Sb2 3.2730(6) 5_545 ? 
Sm1 Sb2 3.2730(6) 5_445 ? 
Sm1 Sb2 3.2754(6) 2_565 ? 
Sm1 Sb2 3.2754(6) 2_564 ? 
Sm1 Ga1 3.3155(7) . ? 
Sm1 Ga1 3.3155(7) 2 ? 
Ga1 Ga1 2.539(2) 2_554 ? 
Ga1 Ga1 2.539(2) 2 ? 
Ga1 Sb1 2.7606(11) 6_554 ? 
Ga1 Sb1 2.7606(11) 5_545 ? 
Ga1 Sm1 3.3155(7) 2_554 ? 
Sb1 Ga1 2.7606(12) 6 ? 
Sb1 Ga1 2.7606(11) 5_455 ? 
Sb1 Sm1 3.2169(3) 6_454 ? 
Sb1 Sm1 3.2169(3) 6 ? 
Sb1 Sm1 3.2169(3) 6_455 ? 
Sb1 Sm1 3.2169(3) 6_554 ? 
Sb2 Sb2 3.0549(2) 6_565 ? 
Sb2 Sb2 3.0549(2) 6_464 ? 
Sb2 Sb2 3.0549(2) 6_465 ? 
Sb2 Sb2 3.0549(2) 6_564 ? 
Sb2 Sm1 3.2729(6) 5_455 ? 
Sb2 Sm1 3.2729(6) 5 ? 
Sb2 Sm1 3.2754(6) 2_565 ? 
Sb2 Sm1 3.2754(6) 2_564 ? 
 
loop_ 
 _geom_angle_atom_site_label_1 
 _geom_angle_atom_site_label_2 
 _geom_angle_atom_site_label_3 
 _geom_angle 
 _geom_angle_site_symmetry_1 
 _geom_angle_site_symmetry_3 
 _geom_angle_publ_flag 
Sb1 Sm1 Sb1 143.49(2) 6_454 6 ? 
Sb1 Sm1 Sb1 84.647(10) 6_454 6_455 ? 
Sb1 Sm1 Sb1 84.089(11) 6 6_455 ? 
Sb1 Sm1 Sb1 84.089(11) 6_454 6_554 ? 
Sb1 Sm1 Sb1 84.647(11) 6 6_554 ? 
Sb1 Sm1 Sb1 143.49(2) 6_455 6_554 ? 
Sb1 Sm1 Sb2 132.583(11) 6_454 5_545 ? 
Sb1 Sm1 Sb2 78.172(13) 6 5_545 ? 
Sb1 Sm1 Sb2 132.583(11) 6_455 5_545 ? 
Sb1 Sm1 Sb2 78.172(13) 6_554 5_545 ? 
Sb1 Sm1 Sb2 78.172(13) 6_454 5_445 ? 
Sb1 Sm1 Sb2 132.583(11) 6 5_445 ? 
Sb1 Sm1 Sb2 78.172(13) 6_455 5_445 ? 
Sb1 Sm1 Sb2 132.583(11) 6_554 5_445 ? 
Sb2 Sm1 Sb2 82.33(2) 5_545 5_445 ? 
Sb1 Sm1 Sb2 132.863(11) 6_454 2_565 ? 
Sb1 Sm1 Sb2 77.863(12) 6 2_565 ? 
Sb1 Sm1 Sb2 77.863(13) 6_455 2_565 ? 
Sb1 Sm1 Sb2 132.863(11) 6_554 2_565 ? 
Sb2 Sm1 Sb2 55.617(9) 5_545 2_565 ? 
Sb2 Sm1 Sb2 55.617(9) 5_445 2_565 ? 
Sb1 Sm1 Sb2 77.863(12) 6_454 2_564 ? 
Sb1 Sm1 Sb2 132.863(11) 6 2_564 ? 
Sb1 Sm1 Sb2 132.863(11) 6_455 2_564 ? 
Sb1 Sm1 Sb2 77.863(12) 6_554 2_564 ? 
Sb2 Sm1 Sb2 55.617(9) 5_545 2_564 ? 
Sb2 Sm1 Sb2 55.617(9) 5_445 2_564 ? 
Sb2 Sm1 Sb2 82.795(19) 2_565 2_564 ? 
Sb1 Sm1 Ga1 67.95(3) 6_454 . ? 
Sb1 Sm1 Ga1 78.27(2) 6 . ? 
Sb1 Sm1 Ga1 93.69(3) 6_455 . ? 
Sb1 Sm1 Ga1 49.97(3) 6_554 . ? 
Sb2 Sm1 Ga1 124.32(3) 5_545 . ? 
Sb2 Sm1 Ga1 145.79(3) 5_445 . ? 
Sb2 Sm1 Ga1 155.362(16) 2_565 . ? 
Sb2 Sm1 Ga1 118.487(12) 2_564 . ? 
Sb1 Sm1 Ga1 78.27(2) 6_454 2 ? 
Sb1 Sm1 Ga1 67.95(3) 6 2 ? 
Sb1 Sm1 Ga1 49.97(3) 6_455 2 ? 
Sb1 Sm1 Ga1 93.69(3) 6_554 2 ? 
Sb2 Sm1 Ga1 145.79(3) 5_545 2 ? 
Sb2 Sm1 Ga1 124.32(3) 5_445 2 ? 
Sb2 Sm1 Ga1 118.487(12) 2_565 2 ? 
Sb2 Sm1 Ga1 155.362(16) 2_564 2 ? 
Ga1 Sm1 Ga1 45.03(3) . 2 ? 
Ga1 Ga1 Ga1 117.08(15) 2_554 2 ? 
Ga1 Ga1 Sb1 86.99(3) 2_554 6_554 ? 
Ga1 Ga1 Sb1 128.071(17) 2 6_554 ? 
Ga1 Ga1 Sb1 128.071(17) 2_554 5_545 ? 
Ga1 Ga1 Sb1 86.98(3) 2 5_545 ? 
Sb1 Ga1 Sb1 114.59(7) 6_554 5_545 ? 
Ga1 Ga1 Sm1 100.04(4) 2_554 . ? 
Ga1 Ga1 Sm1 67.484(16) 2 . ? 
Sb1 Ga1 Sm1 63.158(13) 6_554 . ? 
Sb1 Ga1 Sm1 131.88(3) 5_545 . ? 
Ga1 Ga1 Sm1 67.484(16) 2_554 2_554 ? 
Ga1 Ga1 Sm1 100.04(4) 2 2_554 ? 
Sb1 Ga1 Sm1 131.88(3) 6_554 2_554 ? 
Sb1 Ga1 Sm1 63.158(13) 5_545 2_554 ? 
Sm1 Ga1 Sm1 156.94(6) . 2_554 ? 
Ga1 Sb1 Ga1 83.78(5) 6 5_455 ? 
Ga1 Sb1 Sm1 149.23(2) 6 6_454 ? 
Ga1 Sb1 Sm1 66.87(2) 5_455 6_454 ? 
Ga1 Sb1 Sm1 66.87(2) 6 6 ? 
Ga1 Sb1 Sm1 149.23(2) 5_455 6 ? 
Sm1 Sb1 Sm1 143.49(2) 6_454 6 ? 
Ga1 Sb1 Sm1 109.33(2) 6 6_455 ? 
Ga1 Sb1 Sm1 97.79(3) 5_455 6_455 ? 
Sm1 Sb1 Sm1 84.647(10) 6_454 6_455 ? 
Sm1 Sb1 Sm1 84.089(11) 6 6_455 ? 
Ga1 Sb1 Sm1 97.79(3) 6 6_554 ? 
Ga1 Sb1 Sm1 109.33(2) 5_455 6_554 ? 
Sm1 Sb1 Sm1 84.089(11) 6_454 6_554 ? 
Sm1 Sb1 Sm1 84.647(11) 6 6_554 ? 
Sm1 Sb1 Sm1 143.49(2) 6_455 6_554 ? 
Sb2 Sb2 Sb2 179.74(4) 6_565 6_464 ? 
Sb2 Sb2 Sb2 89.692(9) 6_565 6_465 ? 
Sb2 Sb2 Sb2 90.307(9) 6_464 6_465 ? 
Sb2 Sb2 Sb2 90.307(9) 6_565 6_564 ? 
Sb2 Sb2 Sb2 89.692(8) 6_464 6_564 ? 
Sb2 Sb2 Sb2 179.74(4) 6_465 6_564 ? 
Sb2 Sb2 Sm1 117.55(2) 6_565 5_455 ? 
Sb2 Sb2 Sm1 62.232(14) 6_464 5_455 ? 
Sb2 Sb2 Sm1 62.232(14) 6_465 5_455 ? 
Sb2 Sb2 Sm1 117.55(2) 6_564 5_455 ? 
Sb2 Sb2 Sm1 62.232(14) 6_565 5 ? 
Sb2 Sb2 Sm1 117.55(2) 6_464 5 ? 
Sb2 Sb2 Sm1 117.55(2) 6_465 5 ? 
Sb2 Sb2 Sm1 62.232(14) 6_564 5 ? 
Sm1 Sb2 Sm1 82.33(2) 5_455 5 ? 
Sb2 Sb2 Sm1 62.151(14) 6_565 2_565 ? 
Sb2 Sb2 Sm1 118.07(2) 6_464 2_565 ? 
Sb2 Sb2 Sm1 62.151(14) 6_465 2_565 ? 
Sb2 Sb2 Sm1 118.07(2) 6_564 2_565 ? 
Sm1 Sb2 Sm1 124.383(9) 5_455 2_565 ? 
Sm1 Sb2 Sm1 124.383(9) 5 2_565 ? 
Sb2 Sb2 Sm1 118.07(2) 6_565 2_564 ? 
Sb2 Sb2 Sm1 62.151(14) 6_464 2_564 ? 
Sb2 Sb2 Sm1 118.07(2) 6_465 2_564 ? 
Sb2 Sb2 Sm1 62.151(14) 6_564 2_564 ? 
Sm1 Sb2 Sm1 124.383(9) 5_455 2_564 ? 
Sm1 Sb2 Sm1 124.383(9) 5 2_564 ? 
Sm1 Sb2 Sm1 82.795(19) 2_565 2_564 ? 
 
_diffrn_measured_fraction_theta_max    1.000 
_diffrn_reflns_theta_full              34.93 
_diffrn_measured_fraction_theta_full   1.000 
_refine_diff_density_max    3.316 
_refine_diff_density_min   -3.524 
_refine_diff_density_rms    0.516 

#===============================================================================

data_i4am 
 
_audit_creation_method            SHELXL-97 
_chemical_name_systematic         'neodymium gallium antimonide' 
_chemical_name_common             'neodymium gallium antimonide' 
_chemical_melting_point           ? 
_chemical_formula_moiety          'Ga Nd Sb2' 
_chemical_formula_sum             'Ga Nd Sb2' 
_chemical_formula_weight          457.46 
 
loop_ 
 _atom_type_symbol 
 _atom_type_description 
 _atom_type_scat_dispersion_real 
 _atom_type_scat_dispersion_imag 
 _atom_type_scat_source 
 'Ga'  'Ga'   0.2307   1.6083 
 'International Tables Vol C Tables 4.2.6.8 and 6.1.1.4' 
 'Sb'  'Sb'  -0.5866   1.5461 
 'International Tables Vol C Tables 4.2.6.8 and 6.1.1.4' 
 'Nd'  'Nd'  -0.1943   3.0179 
 'International Tables Vol C Tables 4.2.6.8 and 6.1.1.4' 
 
_symmetry_cell_setting            tetragonal 
_symmetry_space_group_name_H-M    'I 41/a m d' 
 
loop_ 
 _symmetry_equiv_pos_as_xyz 
 'x, y, z' 
 '-x+1/2, -y, z+1/2' 
 '-y+1/4, x+3/4, z+1/4' 
 'y+1/4, -x+1/4, z+3/4' 
 '-x+1/2, y, -z+1/2' 
 'x, -y, -z' 
 'y+1/4, x+3/4, -z+1/4' 
 '-y+1/4, -x+1/4, -z+3/4' 
 'x+1/2, y+1/2, z+1/2' 
 '-x+1, -y+1/2, z+1' 
 '-y+3/4, x+5/4, z+3/4' 
 'y+3/4, -x+3/4, z+5/4' 
 '-x+1, y+1/2, -z+1' 
 'x+1/2, -y+1/2, -z+1/2' 
 'y+3/4, x+5/4, -z+3/4' 
 '-y+3/4, -x+3/4, -z+5/4' 
 '-x, -y, -z' 
 'x-1/2, y, -z-1/2' 
 'y-1/4, -x-3/4, -z-1/4' 
 '-y-1/4, x-1/4, -z-3/4' 
 'x-1/2, -y, z-1/2' 
 '-x, y, z' 
 '-y-1/4, -x-3/4, z-1/4' 
 'y-1/4, x-1/4, z-3/4' 
 '-x+1/2, -y+1/2, -z+1/2' 
 'x, y+1/2, -z' 
 'y+1/4, -x-1/4, -z+1/4' 
 '-y+1/4, x+1/4, -z-1/4' 
 'x, -y+1/2, z' 
 '-x+1/2, y+1/2, z+1/2' 
 '-y+1/4, -x-1/4, z+1/4' 
 'y+1/4, x+1/4, z-1/4' 
 
_cell_length_a                    4.3486(3) 
_cell_length_b                    4.3486(3) 
_cell_length_c                    44.579(8) 
_cell_angle_alpha                 90.00 
_cell_angle_beta                  90.00 
_cell_angle_gamma                 90.00 
_cell_volume                      843.00(17) 
_cell_formula_units_Z             8 
_cell_measurement_temperature     295(2) 
_cell_measurement_reflns_used     24 
_cell_measurement_theta_min       10 
_cell_measurement_theta_max       21 
 
_exptl_crystal_description        plate 
_exptl_crystal_colour             black 
_exptl_crystal_size_max           0.11 
_exptl_crystal_size_mid           0.08 
_exptl_crystal_size_min           0.01 
_exptl_crystal_density_meas       'not measured' 
_exptl_crystal_density_diffrn     7.209 
_exptl_crystal_density_method     'not measured' 
_exptl_crystal_F_000              1544 
_exptl_absorpt_coefficient_mu     30.880 
_exptl_absorpt_correction_type    numerical 
_exptl_absorpt_correction_T_min   0.1323 
_exptl_absorpt_correction_T_max   0.9639 
_exptl_absorpt_process_details    'Bruker SHELXTL 5.1' 
 
_exptl_special_details 
; 
 ? 
; 
 
_diffrn_ambient_temperature       295(2) 
_diffrn_radiation_wavelength      0.71073 
_diffrn_radiation_type            MoK\a 
_diffrn_radiation_source          'fine-focus sealed tube' 
_diffrn_radiation_monochromator   graphite 
_diffrn_measurement_device_type   'Enraf Nonius CAD4' 
_diffrn_measurement_method        \q--2\q 
_diffrn_detector_area_resol_mean  ? 
_diffrn_standards_number          3 
_diffrn_standards_interval_count  ? 
_diffrn_standards_interval_time   7200 
_diffrn_standards_decay_%         ? 
_diffrn_reflns_number             6770 
_diffrn_reflns_av_R_equivalents   0.1027 
_diffrn_reflns_av_sigmaI/netI     0.0344 
_diffrn_reflns_limit_h_min        -7 
_diffrn_reflns_limit_h_max        7 
_diffrn_reflns_limit_k_min        -7 
_diffrn_reflns_limit_k_max        7 
_diffrn_reflns_limit_l_min        -71 
_diffrn_reflns_limit_l_max        71 
_diffrn_reflns_theta_min          1.83 
_diffrn_reflns_theta_max          34.93 
_reflns_number_total              560 
_reflns_number_gt                 440 
_reflns_threshold_expression      >2sigma(I) 
 
_computing_data_collection        'CAD4/PC (Enraf-Nonius)' 
_computing_cell_refinement        'CAD4/PC (Enraf-Nonius)' 
_computing_data_reduction         'XCAD4' 
_computing_structure_solution     'Bruker SHELXTL 5.1' 
_computing_structure_refinement   'Bruker SHELXTL 5.1' 
_computing_molecular_graphics     'ATOMS 4.0' 
_computing_publication_material   'Bruker SHELXTL 5.1' 
 
_refine_special_details 
; 
 Refinement of F^2^ against ALL reflections.  The weighted R-factor wR and 
 goodness of fit S are based on F^2^, conventional R-factors R are based 
 on F, with F set to zero for negative F^2^. The threshold expression of 
 F^2^ > 2sigma(F^2^) is used only for calculating R-factors(gt) etc. and is 
 not relevant to the choice of reflections for refinement.  R-factors based 
 on F^2^ are statistically about twice as large as those based on F, and R- 
 factors based on ALL data will be even larger. 
; 
 
_refine_ls_structure_factor_coef  Fsqd  
_refine_ls_matrix_type            full 
_refine_ls_weighting_scheme       calc  
_refine_ls_weighting_details 
 'calc w=1/[\s^2^(Fo^2^)+(0.0229P)^2^+30.9047P] where P=(Fo^2^+2Fc^2^)/3' 
_atom_sites_solution_primary      direct 
_atom_sites_solution_secondary    difmap 
_atom_sites_solution_hydrogens    geom 
_refine_ls_hydrogen_treatment     mixed 
_refine_ls_extinction_method      SHELXL 
_refine_ls_extinction_coef        0.0046(2) 
_refine_ls_extinction_expression 
 'Fc^*^=kFc[1+0.001xFc^2^\l^3^/sin(2\q)]^-1/4^' 
_refine_ls_number_reflns          560 
_refine_ls_number_parameters      19 
_refine_ls_number_restraints      0 
_refine_ls_R_factor_all           0.0462 
_refine_ls_R_factor_gt            0.0339 
_refine_ls_wR_factor_ref          0.0731 
_refine_ls_wR_factor_gt           0.0684 
_refine_ls_goodness_of_fit_ref    1.104 
_refine_ls_restrained_S_all       1.104 
_refine_ls_shift/su_max           0.000 
_refine_ls_shift/su_mean          0.000 
 
loop_ 
 _atom_site_label 
 _atom_site_type_symbol 
 _atom_site_fract_x 
 _atom_site_fract_y 
 _atom_site_fract_z 
 _atom_site_U_iso_or_equiv 
 _atom_site_adp_type 
 _atom_site_occupancy 
 _atom_site_symmetry_multiplicity 
 _atom_site_calc_flag 
 _atom_site_refinement_flags 
 _atom_site_disorder_assembly 
 _atom_site_disorder_group 
Nd Nd 0.0000 0.2500 0.069357(14) 0.00908(16) Uani 1 4 d S . . 
Ga Ga 0.1649(7) 0.0000 0.0000 0.0345(7) Uani 0.50 2 d SP . . 
Sb1 Sb 0.0000 0.2500 0.203764(18) 0.01077(18) Uani 1 4 d S . . 
Sb2 Sb 0.0000 0.2500 0.3750 0.0100(2) Uani 1 8 d S . . 
Sb3 Sb 0.0000 0.7500 0.1250 0.0096(2) Uani 1 8 d S . . 
 
loop_ 
 _atom_site_aniso_label 
 _atom_site_aniso_U_11 
 _atom_site_aniso_U_22 
 _atom_site_aniso_U_33 
 _atom_site_aniso_U_23 
 _atom_site_aniso_U_13 
 _atom_site_aniso_U_12 
Nd 0.0092(3) 0.0083(3) 0.0097(3) 0.000 0.000 0.000 
Ga 0.0356(13) 0.0534(17) 0.0146(10) 0.0057(11) 0.000 0.000 
Sb1 0.0097(3) 0.0093(3) 0.0134(3) 0.000 0.000 0.000 
Sb2 0.0094(3) 0.0094(3) 0.0112(4) 0.000 0.000 0.000 
Sb3 0.0089(3) 0.0089(3) 0.0109(4) 0.000 0.000 0.000 
 
_geom_special_details 
; 
 All esds (except the esd in the dihedral angle between two l.s. planes) 
 are estimated using the full covariance matrix.  The cell esds are taken 
 into account individually in the estimation of esds in distances, angles 
 and torsion angles; correlations between esds in cell parameters are only 
 used when they are defined by crystal symmetry.  An approximate (isotropic) 
 treatment of cell esds is used for estimating esds involving l.s. planes. 
; 
 
loop_ 
 _geom_bond_atom_site_label_1 
 _geom_bond_atom_site_label_2 
 _geom_bond_distance 
 _geom_bond_site_symmetry_2 
 _geom_bond_publ_flag 
Nd Sb1 3.2431(4) 27_455 ? 
Nd Sb1 3.2431(4) 27_565 ? 
Nd Sb1 3.2431(4) 27_465 ? 
Nd Sb1 3.2431(4) 27 ? 
Nd Sb2 3.2986(6) 25 ? 
Nd Sb3 3.2986(6) . ? 
Nd Sb3 3.2986(6) 1_545 ? 
Nd Sb2 3.2986(6) 25_455 ? 
Nd Ga 3.3549(10) 17 ? 
Nd Ga 3.3549(10) . ? 
Nd Ga 3.3549(10) 10_454 ? 
Nd Ga 3.3549(10) 26 ? 
Ga Ga 1.434(6) 17 ? 
Ga Ga 2.17430(15) 26 ? 
Ga Ga 2.17430(15) 26_545 ? 
Ga Ga 2.605(3) 10_444 ? 
Ga Ga 2.605(3) 10_454 ? 
Ga Sb1 2.7485(17) 27 ? 
Ga Sb1 2.7485(17) 11_544 ? 
Ga Ga 2.915(6) 17_655 ? 
Ga Nd 3.3549(10) 17 ? 
Sb1 Ga 2.7485(18) 27_565 ? 
Sb1 Ga 2.7485(17) 12_454 ? 
Sb1 Ga 2.7485(17) 3_545 ? 
Sb1 Ga 2.7485(18) 20_556 ? 
Sb1 Nd 3.2431(4) 27_455 ? 
Sb1 Nd 3.2431(4) 27_565 ? 
Sb1 Nd 3.2431(4) 27_465 ? 
Sb1 Nd 3.2431(4) 27 ? 
Sb2 Sb3 3.0749(2) 25_565 ? 
Sb2 Sb3 3.0749(2) 25_455 ? 
Sb2 Sb3 3.0749(2) 25_465 ? 
Sb2 Sb3 3.0749(2) 25 ? 
Sb2 Nd 3.2986(6) 3_545 ? 
Sb2 Nd 3.2986(6) 25 ? 
Sb2 Nd 3.2986(6) 25_455 ? 
Sb2 Nd 3.2986(6) 3 ? 
Sb3 Sb2 3.0749(2) 25_565 ? 
Sb3 Sb2 3.0749(2) 25_455 ? 
Sb3 Sb2 3.0749(2) 25_465 ? 
Sb3 Sb2 3.0749(2) 25 ? 
Sb3 Nd 3.2986(6) 27_565 ? 
Sb3 Nd 3.2986(6) 1_565 ? 
Sb3 Nd 3.2986(6) 27_465 ? 
 
loop_ 
 _geom_angle_atom_site_label_1 
 _geom_angle_atom_site_label_2 
 _geom_angle_atom_site_label_3 
 _geom_angle 
 _geom_angle_site_symmetry_1 
 _geom_angle_site_symmetry_3 
 _geom_angle_publ_flag 
Sb1 Nd Sb1 142.94(4) 27_455 27_565 ? 
Sb1 Nd Sb1 84.203(11) 27_455 27_465 ? 
Sb1 Nd Sb1 84.203(11) 27_565 27_465 ? 
Sb1 Nd Sb1 84.203(11) 27_455 27 ? 
Sb1 Nd Sb1 84.203(11) 27_565 27 ? 
Sb1 Nd Sb1 142.94(4) 27_465 27 ? 
Sb1 Nd Sb2 132.916(16) 27_455 25 ? 
Sb1 Nd Sb2 78.291(15) 27_565 25 ? 
Sb1 Nd Sb2 132.916(16) 27_465 25 ? 
Sb1 Nd Sb2 78.291(15) 27 25 ? 
Sb1 Nd Sb3 132.916(16) 27_455 . ? 
Sb1 Nd Sb3 78.291(15) 27_565 . ? 
Sb1 Nd Sb3 78.291(15) 27_465 . ? 
Sb1 Nd Sb3 132.916(16) 27 . ? 
Sb2 Nd Sb3 55.563(11) 25 . ? 
Sb1 Nd Sb3 78.291(15) 27_455 1_545 ? 
Sb1 Nd Sb3 132.916(16) 27_565 1_545 ? 
Sb1 Nd Sb3 132.916(16) 27_465 1_545 ? 
Sb1 Nd Sb3 78.291(15) 27 1_545 ? 
Sb2 Nd Sb3 55.563(11) 25 1_545 ? 
Sb3 Nd Sb3 82.472(18) . 1_545 ? 
Sb1 Nd Sb2 78.291(15) 27_455 25_455 ? 
Sb1 Nd Sb2 132.916(16) 27_565 25_455 ? 
Sb1 Nd Sb2 78.291(15) 27_465 25_455 ? 
Sb1 Nd Sb2 132.916(16) 27 25_455 ? 
Sb2 Nd Sb2 82.472(18) 25 25_455 ? 
Sb3 Nd Sb2 55.563(11) . 25_455 ? 
Sb3 Nd Sb2 55.563(11) 1_545 25_455 ? 
Sb1 Nd Ga 49.20(4) 27_455 17 ? 
Sb1 Nd Ga 93.88(4) 27_565 17 ? 
Sb1 Nd Ga 77.35(4) 27_465 17 ? 
Sb1 Nd Ga 68.48(4) 27 17 ? 
Sb2 Nd Ga 146.50(5) 25 17 ? 
Sb3 Nd Ga 155.04(3) . 17 ? 
Sb3 Nd Ga 118.648(11) 1_545 17 ? 
Sb2 Nd Ga 123.52(5) 25_455 17 ? 
Sb1 Nd Ga 68.48(4) 27_455 . ? 
Sb1 Nd Ga 77.35(4) 27_565 . ? 
Sb1 Nd Ga 93.88(4) 27_465 . ? 
Sb1 Nd Ga 49.20(4) 27 . ? 
Sb2 Nd Ga 123.52(5) 25 . ? 
Sb3 Nd Ga 155.04(3) . . ? 
Sb3 Nd Ga 118.648(11) 1_545 . ? 
Sb2 Nd Ga 146.50(5) 25_455 . ? 
Ga Nd Ga 24.68(10) 17 . ? 
Sb1 Nd Ga 77.35(4) 27_455 10_454 ? 
Sb1 Nd Ga 68.48(4) 27_565 10_454 ? 
Sb1 Nd Ga 49.20(4) 27_465 10_454 ? 
Sb1 Nd Ga 93.88(4) 27 10_454 ? 
Sb2 Nd Ga 146.50(5) 25 10_454 ? 
Sb3 Nd Ga 118.648(11) . 10_454 ? 
Sb3 Nd Ga 155.04(3) 1_545 10_454 ? 
Sb2 Nd Ga 123.52(5) 25_455 10_454 ? 
Ga Nd Ga 37.816(12) 17 10_454 ? 
Ga Nd Ga 45.68(5) . 10_454 ? 
Sb1 Nd Ga 93.88(4) 27_455 26 ? 
Sb1 Nd Ga 49.20(4) 27_565 26 ? 
Sb1 Nd Ga 68.48(4) 27_465 26 ? 
Sb1 Nd Ga 77.35(4) 27 26 ? 
Sb2 Nd Ga 123.52(5) 25 26 ? 
Sb3 Nd Ga 118.648(11) . 26 ? 
Sb3 Nd Ga 155.04(3) 1_545 26 ? 
Sb2 Nd Ga 146.50(4) 25_455 26 ? 
Ga Nd Ga 45.68(5) 17 26 ? 
Ga Nd Ga 37.816(12) . 26 ? 
Ga Nd Ga 24.68(10) 10_454 26 ? 
Ga Ga Ga 90.0 17 26 ? 
Ga Ga Ga 90.0 17 26_545 ? 
Ga Ga Ga 180.00(16) 26 26_545 ? 
Ga Ga Ga 56.59(11) 17 10_444 ? 
Ga Ga Ga 146.59(11) 26 10_444 ? 
Ga Ga Ga 33.41(11) 26_545 10_444 ? 
Ga Ga Ga 56.59(11) 17 10_454 ? 
Ga Ga Ga 33.41(11) 26 10_454 ? 
Ga Ga Ga 146.59(11) 26_545 10_454 ? 
Ga Ga Ga 113.2(2) 10_444 10_454 ? 
Ga Ga Sb1 122.02(5) 17 27 ? 
Ga Ga Sb1 113.300(15) 26 27 ? 
Ga Ga Sb1 66.700(16) 26_545 27 ? 
Ga Ga Sb1 87.81(4) 10_444 27 ? 
Ga Ga Sb1 128.471(18) 10_454 27 ? 
Ga Ga Sb1 122.02(5) 17 11_544 ? 
Ga Ga Sb1 66.700(16) 26 11_544 ? 
Ga Ga Sb1 113.300(16) 26_545 11_544 ? 
Ga Ga Sb1 128.471(18) 10_444 11_544 ? 
Ga Ga Sb1 87.81(4) 10_454 11_544 ? 
Sb1 Ga Sb1 115.96(11) 27 11_544 ? 
Ga Ga Ga 180.0 17 17_655 ? 
Ga Ga Ga 90.0 26 17_655 ? 
Ga Ga Ga 90.0 26_545 17_655 ? 
Ga Ga Ga 123.41(11) 10_444 17_655 ? 
Ga Ga Ga 123.41(11) 10_454 17_655 ? 
Sb1 Ga Ga 57.98(5) 27 17_655 ? 
Sb1 Ga Ga 57.98(5) 11_544 17_655 ? 
Ga Ga Nd 77.66(5) 17 17 ? 
Ga Ga Nd 108.908(6) 26 17 ? 
Ga Ga Nd 71.092(6) 26_545 17 ? 
Ga Ga Nd 67.16(3) 10_444 17 ? 
Ga Ga Nd 98.79(7) 10_454 17 ? 
Sb1 Ga Nd 132.55(4) 27 17 ? 
Sb1 Ga Nd 63.280(15) 11_544 17 ? 
Ga Ga Nd 102.34(5) 17_655 17 ? 
Ga Ga Nd 77.66(5) 17 . ? 
Ga Ga Nd 71.092(6) 26 . ? 
Ga Ga Nd 108.908(6) 26_545 . ? 
Ga Ga Nd 98.79(7) 10_444 . ? 
Ga Ga Nd 67.16(3) 10_454 . ? 
Sb1 Ga Nd 63.280(15) 27 . ? 
Sb1 Ga Nd 132.55(4) 11_544 . ? 
Ga Ga Nd 102.34(5) 17_655 . ? 
Nd Ga Nd 155.32(10) 17 . ? 
Ga Sb1 Ga 46.60(3) 27_565 12_454 ? 
Ga Sb1 Ga 64.04(11) 27_565 3_545 ? 
Ga Sb1 Ga 82.83(8) 12_454 3_545 ? 
Ga Sb1 Ga 82.83(8) 27_565 20_556 ? 
Ga Sb1 Ga 64.04(11) 12_454 20_556 ? 
Ga Sb1 Ga 46.60(3) 3_545 20_556 ? 
Ga Sb1 Nd 149.21(4) 27_565 27_455 ? 
Ga Sb1 Nd 109.19(4) 12_454 27_455 ? 
Ga Sb1 Nd 98.51(5) 3_545 27_455 ? 
Ga Sb1 Nd 67.52(4) 20_556 27_455 ? 
Ga Sb1 Nd 67.52(4) 27_565 27_565 ? 
Ga Sb1 Nd 98.51(5) 12_454 27_565 ? 
Ga Sb1 Nd 109.19(4) 3_545 27_565 ? 
Ga Sb1 Nd 149.21(4) 20_556 27_565 ? 
Nd Sb1 Nd 142.94(4) 27_455 27_565 ? 
Ga Sb1 Nd 98.51(5) 27_565 27_465 ? 
Ga Sb1 Nd 67.52(3) 12_454 27_465 ? 
Ga Sb1 Nd 149.21(4) 3_545 27_465 ? 
Ga Sb1 Nd 109.19(3) 20_556 27_465 ? 
Nd Sb1 Nd 84.203(11) 27_455 27_465 ? 
Nd Sb1 Nd 84.203(11) 27_565 27_465 ? 
Ga Sb1 Nd 109.19(3) 27_565 27 ? 
Ga Sb1 Nd 149.21(4) 12_454 27 ? 
Ga Sb1 Nd 67.52(3) 3_545 27 ? 
Ga Sb1 Nd 98.51(5) 20_556 27 ? 
Nd Sb1 Nd 84.203(11) 27_455 27 ? 
Nd Sb1 Nd 84.203(11) 27_565 27 ? 
Nd Sb1 Nd 142.94(4) 27_465 27 ? 
Sb3 Sb2 Sb3 180.0 25_565 25_455 ? 
Sb3 Sb2 Sb3 90.0 25_565 25_465 ? 
Sb3 Sb2 Sb3 90.0 25_455 25_465 ? 
Sb3 Sb2 Sb3 90.0 25_565 25 ? 
Sb3 Sb2 Sb3 90.0 25_455 25 ? 
Sb3 Sb2 Sb3 180.0 25_465 25 ? 
Sb3 Sb2 Nd 117.781(5) 25_565 3_545 ? 
Sb3 Sb2 Nd 62.219(5) 25_455 3_545 ? 
Sb3 Sb2 Nd 117.781(5) 25_465 3_545 ? 
Sb3 Sb2 Nd 62.219(5) 25 3_545 ? 
Sb3 Sb2 Nd 62.219(5) 25_565 25 ? 
Sb3 Sb2 Nd 117.781(5) 25_455 25 ? 
Sb3 Sb2 Nd 117.781(5) 25_465 25 ? 
Sb3 Sb2 Nd 62.219(5) 25 25 ? 
Nd Sb2 Nd 124.437(11) 3_545 25 ? 
Sb3 Sb2 Nd 117.781(5) 25_565 25_455 ? 
Sb3 Sb2 Nd 62.219(5) 25_455 25_455 ? 
Sb3 Sb2 Nd 62.219(5) 25_465 25_455 ? 
Sb3 Sb2 Nd 117.781(5) 25 25_455 ? 
Nd Sb2 Nd 124.437(11) 3_545 25_455 ? 
Nd Sb2 Nd 82.472(18) 25 25_455 ? 
Sb3 Sb2 Nd 62.219(5) 25_565 3 ? 
Sb3 Sb2 Nd 117.781(5) 25_455 3 ? 
Sb3 Sb2 Nd 62.219(5) 25_465 3 ? 
Sb3 Sb2 Nd 117.781(5) 25 3 ? 
Nd Sb2 Nd 82.472(18) 3_545 3 ? 
Nd Sb2 Nd 124.437(11) 25 3 ? 
Nd Sb2 Nd 124.437(11) 25_455 3 ? 
Sb2 Sb3 Sb2 180.0 25_565 25_455 ? 
Sb2 Sb3 Sb2 90.0 25_565 25_465 ? 
Sb2 Sb3 Sb2 90.0 25_455 25_465 ? 
Sb2 Sb3 Sb2 90.0 25_565 25 ? 
Sb2 Sb3 Sb2 90.0 25_455 25 ? 
Sb2 Sb3 Sb2 180.0 25_465 25 ? 
Sb2 Sb3 Nd 62.219(5) 25_565 27_565 ? 
Sb2 Sb3 Nd 117.781(5) 25_455 27_565 ? 
Sb2 Sb3 Nd 117.781(5) 25_465 27_565 ? 
Sb2 Sb3 Nd 62.219(5) 25 27_565 ? 
Sb2 Sb3 Nd 117.781(5) 25_565 . ? 
Sb2 Sb3 Nd 62.219(5) 25_455 . ? 
Sb2 Sb3 Nd 117.781(5) 25_465 . ? 
Sb2 Sb3 Nd 62.219(5) 25 . ? 
Nd Sb3 Nd 124.437(11) 27_565 . ? 
Sb2 Sb3 Nd 62.219(5) 25_565 1_565 ? 
Sb2 Sb3 Nd 117.781(5) 25_455 1_565 ? 
Sb2 Sb3 Nd 62.219(5) 25_465 1_565 ? 
Sb2 Sb3 Nd 117.781(5) 25 1_565 ? 
Nd Sb3 Nd 124.437(11) 27_565 1_565 ? 
Nd Sb3 Nd 82.472(18) . 1_565 ? 
Sb2 Sb3 Nd 117.781(5) 25_565 27_465 ? 
Sb2 Sb3 Nd 62.219(5) 25_455 27_465 ? 
Sb2 Sb3 Nd 62.219(5) 25_465 27_465 ? 
Sb2 Sb3 Nd 117.781(5) 25 27_465 ? 
Nd Sb3 Nd 82.472(18) 27_565 27_465 ? 
Nd Sb3 Nd 124.437(11) . 27_465 ? 
Nd Sb3 Nd 124.437(11) 1_565 27_465 ? 
 
_diffrn_measured_fraction_theta_max    1.000 
_diffrn_reflns_theta_full              34.93 
_diffrn_measured_fraction_theta_full   1.000 
_refine_diff_density_max    3.221 
_refine_diff_density_min   -1.947 
_refine_diff_density_rms    0.419 

#===END
